# Supplementary material
Source: publisher site journal article supplement (https://www.dovepress.com/article/506658)
Supplement: Supplementary file 1 [file get_supplementary_file.php]

**Supplementary Table 1** CROs detection rates in neurosurgery in 2021

| CROs | The whole hospital | | | | The neurosurgery | | | *χ2* | *P* value |
| --- | --- | --- | --- | --- | --- | --- | --- | --- | --- |
| Total number of the particular type of bacteria | Number of CROs detection | Detection rate, % | Total number of the particular type of bacteria | | Number of CROs detection | Detection rate, % |
| CREC | 491 | 26 | 5.30 | 5 | | 1 | 20.00 | 2.079 | 0.149 |
| CRKP | 393 | 166 | 42.24 | 55 | | 39 | 70.91 | 15.978 | 0.000 |
| CRAB | 233 | 130 | 55.79 | 38 | | 30 | 78.95 | 7.243 | 0.007 |
| CRPA | 352 | 75 | 21.31 | 46 | | 19 | 41.30 | 9.019 | 0.003 |
| Total | 1469 | 397 | 27.03 | 144 | | 89 | 61.81 | 75.358 | 0.000 |

Abbreviations: CROs, carbapenem-resistant organisms; CREC, carbapenem-resistant *Escherichia coli*; CRKP, Carbapenem-resistant *Klebsiella pneumonia*; CRAB, carbapenem-resistant *Acinetobacter baumannii*; CRPA, carbapenem-resistant *Pseudomonas aeruginosa*.
